# Supplementary material
Source: PubMed Central journal article supplement (PMC3025308)
Supplement: NIHMS244396-supplement-01.pdf [file NIHMS244396-supplement-01.pdf]

**Table S1****Table S1** List of PCR primers used in this study

| Primer    | Sequence (5'-3')         |
|-----------|--------------------------|
| Id3-1     | TCTTCAGTCCTTGGAGGCAG     |
| YZ29      | TCGCAGCGCATCGCCTTCTA     |
| Flp-F     | CACTGATATTGTAAGTAGTTTGC  |
| Flp-B     | CTAGTGCGAAGTAGTGATCAGG   |
| Id3-2     | GGGTTTGCTCAAGATTATGTGTCG |
| Id3-3     | GCTCTGAGGTCATAAATCCC     |
| Tek-F     | GCCTGCATTACCGGTCGATGC    |
| Tek-R     | CAGGGTGTTATAAGCAATCCC    |
| Id3ckoF   | TTCCTCATTCCCTCGCATCCG    |
| Id3ckoB   | GGCTTTTTCCCTAAACCGACTG   |
| mId3QPCRF | GCCTCTTAGCCTCTTGGACG     |
| mId3QPCRB | GTTCCGGAGAGAGCTCAGC      |
| Actb-L1   | AAGGCCAACCGTGAAAAGAT     |
| Actb-R1   | GTGGTACGACCAGAGGCATAC    |

Figure S1

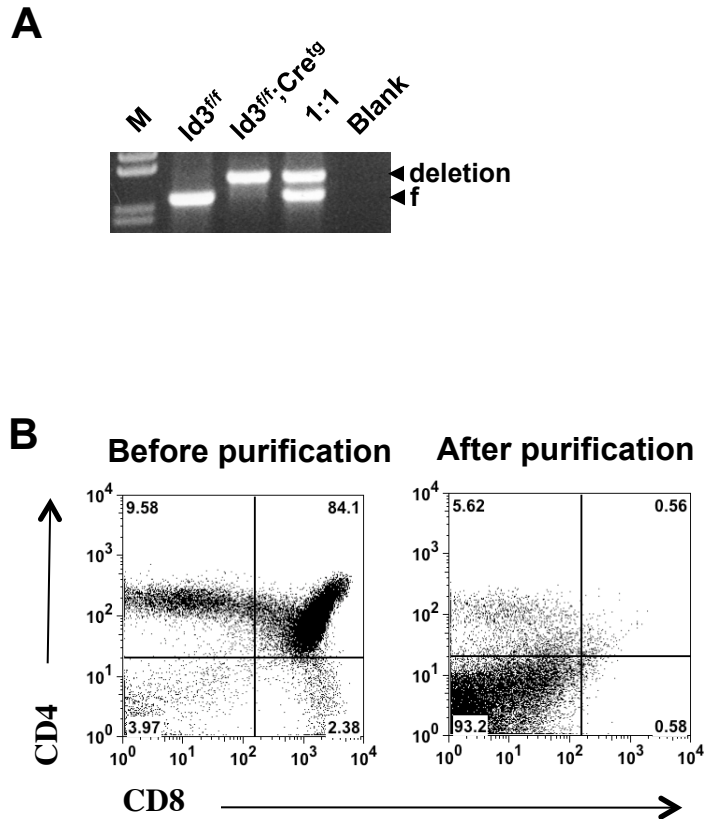

Figure S1. (A). Competitive PCR assay for *Id3* deletion using three primers, *Id3*-2, *Id3*ckoF and *Id3*ckoB. The reaction produces a 1.07-kb band for the *Id3*<sup>f</sup> allele and a 1.34-kb band for the deleted allele. The DNA templates were from total thymocytes in *Id3*<sup>fl/fl</sup>, *Id3*<sup>fl/fl</sup>; *LckCre* and 1:1 mixture of the first two samples, respectively. M, 1 Kb plus DNA marker. Blank, water as blank control. (B). Separation of DN cells from DP/SP cells with Dynal beads. CD4 and CD8 double staining of total thymocytes before and after Dynal bead depletion of DP/SP cells with CD4 and CD8 antibodies.

Figure S2

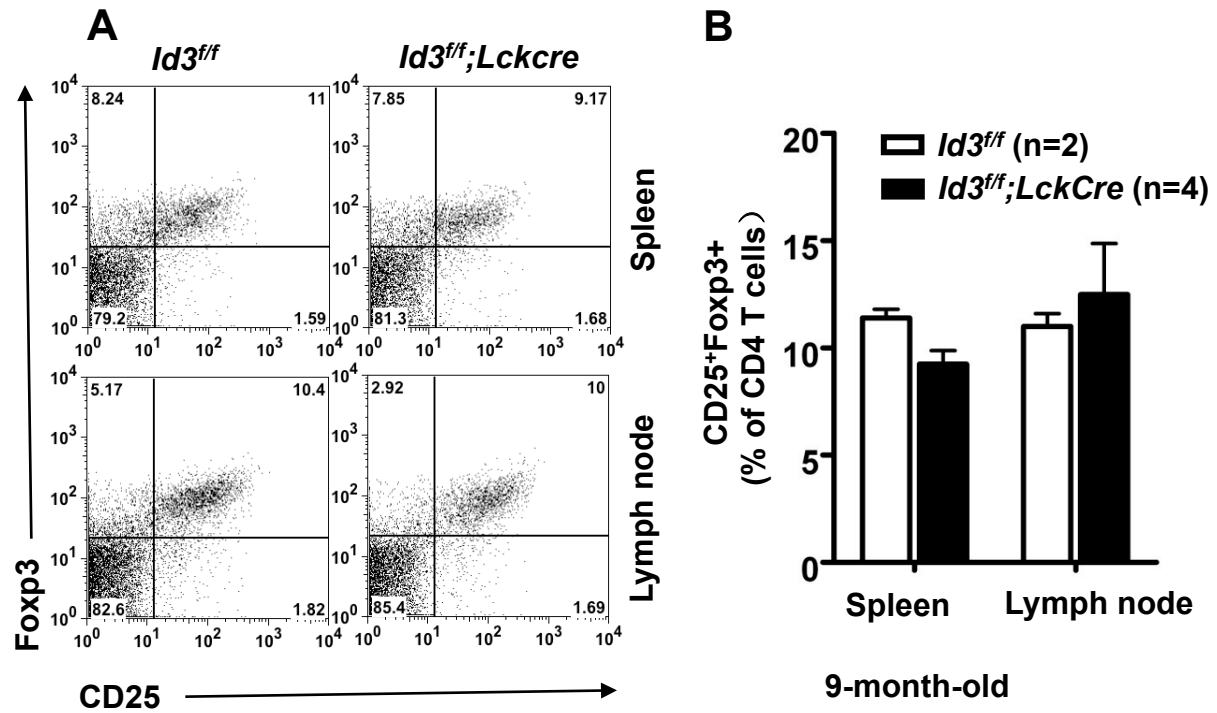

Figure S2. FACS analysis of Treg (CD25<sup>+</sup>Foxp3<sup>+</sup>) cells in 9-month old *Id3<sup>ff</sup>;LckCre* mice and *Id3<sup>ff</sup>* controls. (A) Representative FACS plot of Treg cells among gated CD4 T cells in the spleen (upper panel) and lymph node (bottom panel). (B) Statistical analysis of the ratio of Treg cells in total CD4 T cells. The graphed results were means with SEM. The significance was analyzed by two-tail unpaired student's t test. P=0.09 for spleen and p=0.70 for lymph node.
